# Supplementary material for: Effect of the Combined Treatments with LC2017 and Trichoderma atroviride Strain I-1237 on Disease Development and Defense Responses in Vines Infected by Lasiodiplodia theobromae
Source: MDPI journal article supplement (doi:10.3390/agronomy12050996), 2022-04-21
Supplement: s1 [file s1]

## Supplementary material

**Table S1.** Primers of genes analyzed by quantitative real-time reverse-transcription polymerase chain reaction.

| Function                            | Gene                                                 | Primer Sequences                | GenBank or TC TIGR* Accession Number |
|-------------------------------------|------------------------------------------------------|---------------------------------|--------------------------------------|
| Reference genes                     | <i>EF1</i> (EF1- $\alpha$ elongation factor)         | 5'-GAACGGGGTGCTTGATAGGC-3'      | GU585871                             |
|                                     |                                                      | 5'-AACCAAAATATCCGGAGTAAAGA-3'   |                                      |
|                                     | <i>60SRP</i> (60S ribosomal protein L18)             | 5'-ATCTACCTCAAGCTCCTAGTC-3'     | XM_002270599                         |
|                                     |                                                      | 5'-CAATCTTGCTCCTTCCT-3'         |                                      |
| Phenylpropanoid metabolism          | <i>PAL</i> (Phenylalanine ammonia lyase)             | 5'-TCCTCCCGGAAACAGCTG-3'        | X75967                               |
|                                     |                                                      | 5'-TCCTCCAATGCCTCAATCA-3'       |                                      |
|                                     | <i>STS</i> (Stilbene synthase)                       | 5'-AGGAAGCAGCATTGAAGGCTC-3'     | FJ851185                             |
|                                     |                                                      | 5'-TGACCCAGGCATTTCTACACC-3'     |                                      |
| Defense protein                     | <i>CHIT4C</i> (Chitinase class V)                    | 5'-TCGAATGGGATGGTGGA -3'        | NM_001281244                         |
|                                     |                                                      | 5'-TCCCCTGTCGAAACACCAAG -3'     |                                      |
|                                     | <i>GLUC</i> ( $\beta$ -1,3 glucanase)                | 5'-TCAATGGCTGCAATGGTG-3'        | DQ267748                             |
|                                     |                                                      | 5'-CGGTCGATGTTGCGAGATTTA-3'     |                                      |
|                                     | <i>PR1</i> (pathogenesis-related protein 1)          | 5'- GGAGTCCATTAGCACTCCTTG -3'   | XM_002273752                         |
|                                     |                                                      | 5'- CATAATTCTGGGCGTAGGCAG -3'   |                                      |
|                                     | <i>PR10</i> (pathogenesis-related protein 10)        | 5'- CGTTAAGGGCGGCAAGAG -3'      | DQ396809                             |
|                                     |                                                      | 5'- GCATCAGGGGTGCCAAGA -3'      |                                      |
| Detoxification and Stress tolerance | <i>GST1</i> (Glutathione s-transferase 1)            | 5'- TGCATGGAGGAGGAGTTCGT -3'    | NM_001281248                         |
|                                     |                                                      | 5'- CAAGGCTATATCCCATTTTCTTC -3' |                                      |
| Arsenite recovery genes             | <i>PME25</i> (pectin esterase inhibitor)             | 5'-TGTCGGAGCTGAATGTGGA-3'       | XM_002273391.4                       |
|                                     |                                                      | 5'-CGATCCCGCTAAGCAGAGTTT-3'     |                                      |
|                                     | <i>MSR</i> (Peptide methionine sulfoxide reductase)) | 5'-GCATTTGGGCGTGTAGATGG-3'      | XM_010662104.2                       |
|                                     |                                                      | 5'-GCTTCAGTGTGCCTGTTCT -3'      |                                      |
|                                     | <i>WRKY</i> (transcription factors)                  | 5'-GGGCAGAAGGACATTCTTGGA -3'    | XM_002272684.3                       |
|                                     |                                                      | 5'-AGGGATCTTCATCCGAACGC -3'     |                                      |
|                                     | <i>HYD2</i> (ABA 8' hydroxylase 2)                   | 5'-GAAGCTTGTTCTCCGAGCCT -3'     | NM_001281052.1                       |
|                                     |                                                      | 5'-TATTGATCGACCGCCTTCC -3'      |                                      |

\* see <http://www.jcvi.org/cms/research/projects/tdb/overview/>

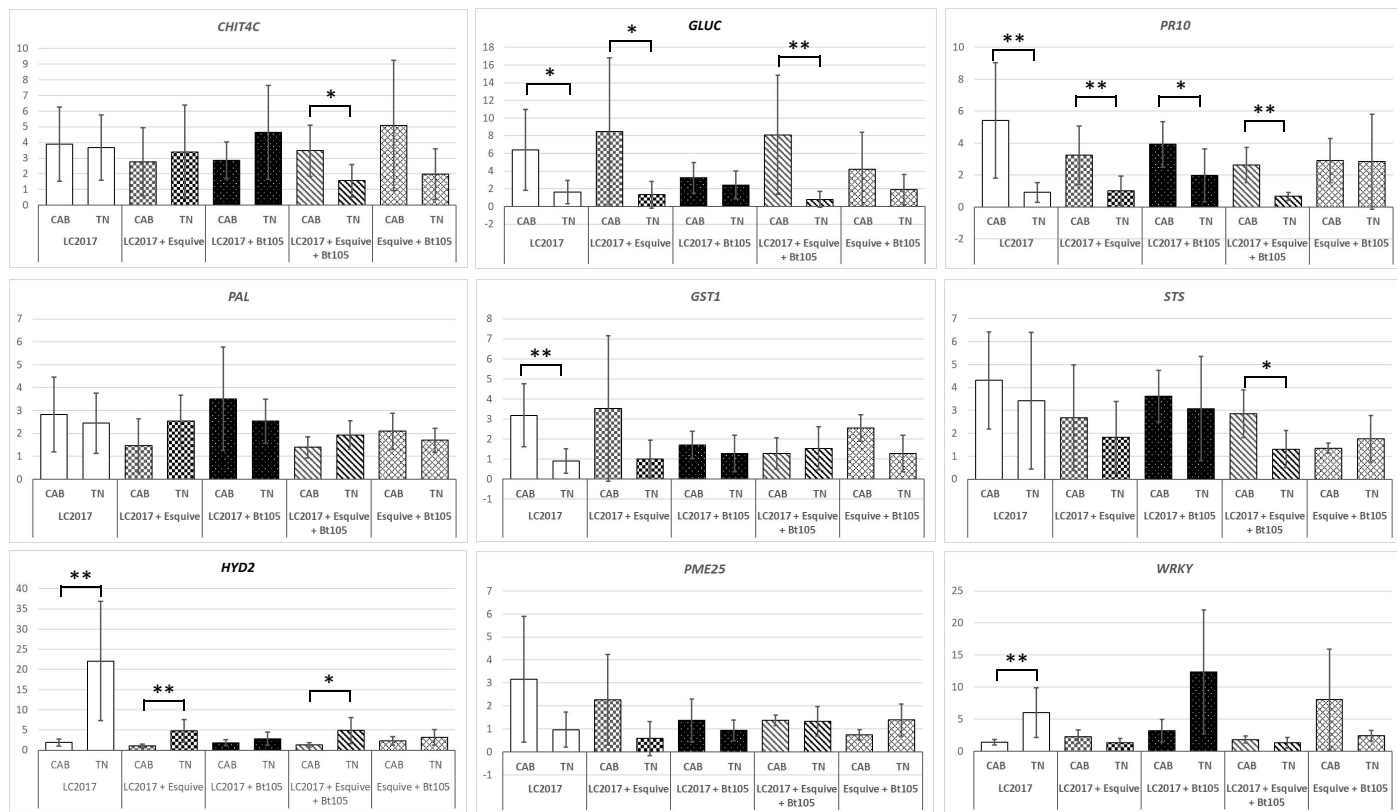

**Figure S1:** Comparison of the 9 targeted genes with induction values  $>2$  recorded at  $T_0+5d$  on the different condition of treatments (LC2017 alone, LC2017 and Esquivé) between Cabernet Sauvignon (CAB) and Touriga Nacional (TN) not infected or inoculated with *L. theobromae* (Bt105). The asterisk indicates a statistical significance (Mann-Whitney U test) between the medians of the two considered condition. \* =  $p < 0.05$ ; \*\* =  $p < 0.01$
